# Supplementary material
Source: PubMed Central journal article supplement (PMC10720697)
Supplement: NIHMS1832126-supplement-1.pdf [file NIHMS1832126-supplement-1.pdf]

## SUPPLEMENTAL MATERIALS

### 503 Appendix A: Implementation

504 **Title:** RCATE package

505 **R-package for robust estimation of CATE:** R package **RCATE** containing code for 9 robust estima-  
 506 tion algorithms of CATE described in the article and also the methods based on additive B-spline  
 507 LAD regression in R.Li. The package also contains the dataset used as example in the article.

508 **Hypertension dataset:** Data set used in the illustration of robust estimation of CATE algorithms in  
 509 Section 4.

510 **Example of usage:**

```

511 ## Install package
512 require(devtools)
513 devtools::install_github("rhli-Hannah/RCATE")
514 library(RCATE)

515
516 ## Data generation
517 n <- 1000; p <- 3; set.seed(2223)
518 X <- as.data.frame(matrix(runif(n*p, -3, 3), nrow=n, ncol=p))
519 tau = 6*sin(2*X[,1])+3*(X[,2]+3)*X[,3]
520 p = 1/(1+exp(-X[,1]+X[,2]))
521 d = rbinom(n,1,p)
522 t = 2*d-1
523 y = 100+4*X[,1]+X[,2]-3*X[,3]+tau*t/2 + rnorm(n,0,1)
524 set.seed(2223)
525 x_val = as.data.frame(matrix(rnorm(200*3,0,1), nrow=200, ncol=3))
526 tau_val = 6*sin(2*x_val[,1])+3*(x_val[,2]+3)*x_val[,3]
527
528 ## Use robust GBM + R-learning to estimate CATE
529 fit <- rcate.ml(X,y,d,method='RL',algorithm='GBM')
530 y_pred <- predict(fit,x_val)$predict
531 plot(tau_val,y_pred); abline(0,1)

```

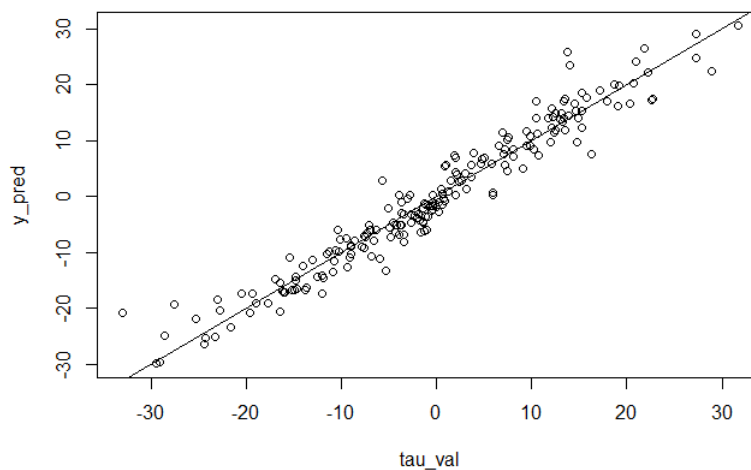

```
532
533 ## Variable importance level
534 importance <- importance.rcate(fit)
```

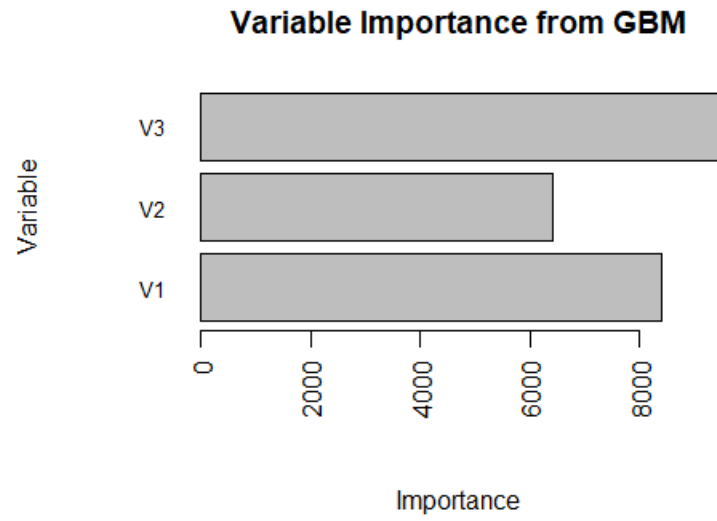

```
535
536 ## Marginal treatment effect plot
537 marginal.rcate(fit , 'V1')
538 marginal.rcate(fit , 'V3')
```

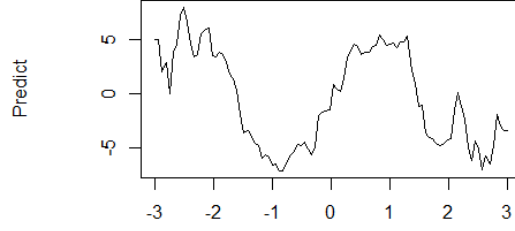

V1

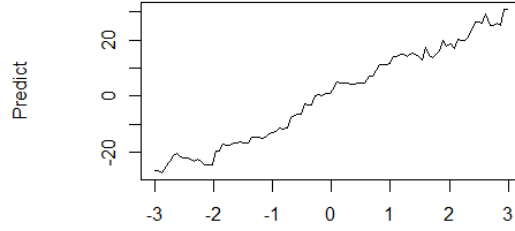

V3

## 539 Appendix B: Supplemental Simulation Study Results

540 **Supplemental Simulation Study (S):** We compared the algorithm-based robust estimators against the  
 541 model-based ones when the true treatment effect models were correctly specified. Here we assumed that the  
 542 true effect effect  $\tau$  was an additive function of  $\mathbf{X}$ . In such a situation, robust methods based on generalized  
 543 additive models (GAM) should provide correct estimates. We also included in the simulation an  $L_1$ -based  
 544 Q-learner (robust QL) for comparison.

Specifically, we defined the last two methods as follows:

$$\text{Robust GAM: } \hat{\beta} = \underset{\beta}{\operatorname{argmin}} \frac{1}{n} \sum_{i=1}^n w_i^*(X_i, T_i) |Y_i^* - B(X_i)^T \beta| + \Lambda_n(\beta),$$

$$\text{Robust QL: } \hat{\gamma}, \hat{\beta} = \underset{\gamma, \beta}{\operatorname{argmin}} \frac{1}{n} \sum_{i=1}^n |Y_i - B(X_i)^T \gamma - \frac{T_i}{2} B(X_i)^T \beta| + \Lambda_n(\gamma, \beta),$$

545 where  $\Lambda$  is a smoothness-sparsity penalty for group-wise variable selection and for smoothness of the regres-  
 546 sion line.

547 Model-based estimators can be more efficient when they depict the treatment effect with the right  
 548 function. We simulated a situation where the true treatment effect  $\tau$  is an additive function of  $\mathbf{X}$ . Since  
 549 the model-based estimators used GAM to depict  $\tau(\mathbf{X})$ , we expect them to perform well. Algorithm-based  
 550 estimators, on the other hand, may have reduced efficiency while offering a greater protection against model  
 551 misspecification. Here we used model-based methods as a benchmark, and compared the performance of the  
 552 algorithm-based estimators as sample size increased.

553 We compared all methods indicated by “(S)” in Table 4. We considered two scenarios: (1) For the  
 554 robust GAMs, we fixed the sample size at  $n_0 = 200$ , and for robust GBMs, robust RFs, and robust ANNs,

555 we increased the sample size from 200 to 1000 by an increment of 200; (2) For the robust GAMs, we fixed  
 556 the sample size at  $n_0 = 1000$ ; for the proposed robust algorithms, we increased the sample size from 1000  
 557 to 7000 by an increment of 2000. Specifically, we used two different error distributions  $P = N(0, 100)$  and  
 558  $P = Laplace(0, \sqrt{50})$ , while fixing the proportion of outliers at  $p_o = 0.15$ . The covariates were continuous  
 559 variables ( $\mathbf{X}_i \sim N_{10}(0, 1)$ ).

Functions  $b_0(\mathbf{X}_i)$  and  $\tau_0(\mathbf{X}_i)$  in the response surface were

$$b_0(\mathbf{X}_i) = 100 + 4X_{i1} + X_{i2} - 3X_{i3},$$

$$\tau_0(\mathbf{X}_i) = 6\sin(2X_{i1}) + 3X_{i2} + X_{i3} + 9\tanh(0.5X_{i4}) + 3X_{i5},$$

560 where the true treatment effect function was an additive model of covariates. We reported the MSE of the  
 561 CATE estimates graphically in Figure B.1.

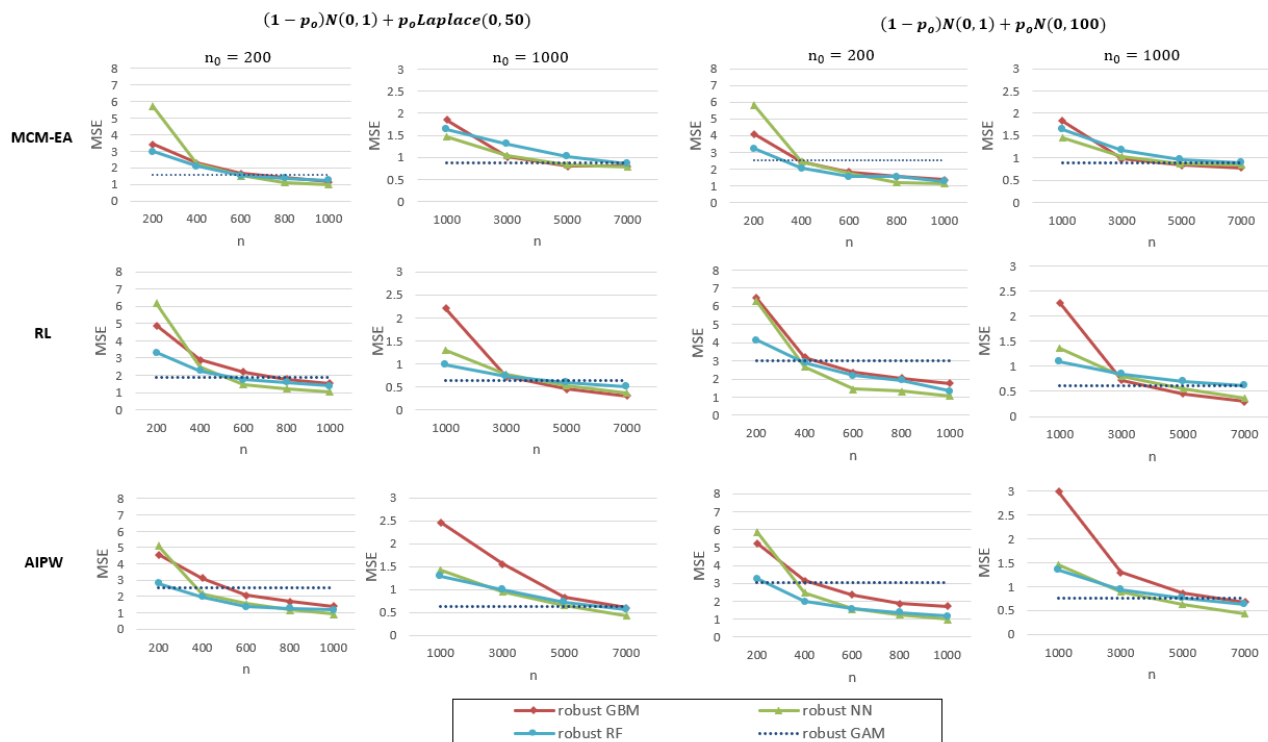

Figure B.1: Simulation results of Simulation S - MSE of different methods under different sample sizes. The robust GBMs were indicated by red solid line, the robust RFs were indicated by blue solid line, the robust ANNs were indicated by green solid line. The robust GAMs were indicated by blue dotted line. In the first and third columns of figures, the sample size of robust GAMs methods was  $n_0 = 200$ ; in the second the fourth columns of figures, the sample size of robust GAMs methods was  $n_0 = 1000$ .

562 Figure B.1 showed that machine-learning algorithms' performance improved with the sample size.

Table B.1: Simulation Results of Simulation S ( $n_0 = 200$ )

|     |            | MCM-EA                  |       |       |       |       |             |       |       |       |       |
|-----|------------|-------------------------|-------|-------|-------|-------|-------------|-------|-------|-------|-------|
|     |            | $Laplace(0, \sqrt{50})$ |       |       |       |       | $N(0, 100)$ |       |       |       |       |
|     | $n$        | 200                     | 400   | 600   | 800   | 1000  | 200         | 400   | 600   | 800   | 1000  |
| MSE | robust GBM | 3.43                    | 2.28  | 1.66  | 1.39  | 1.14  | 4.08        | 2.43  | 1.80  | 1.55  | 1.37  |
|     | GBM        | 19.96                   | 13.87 | 10.95 | 8.99  | 7.69  | 21.64       | 14.18 | 11.33 | 9.36  | 7.33  |
|     | robust NN  | 5.70                    | 2.25  | 1.54  | 1.12  | 1.00  | 5.84        | 2.45  | 1.74  | 1.21  | 1.14  |
|     | NN         | 6.50                    | 3.95  | 3.01  | 2.60  | 2.17  | 6.79        | 4.09  | 3.01  | 2.69  | 2.23  |
|     | robust RF  | 2.96                    | 2.10  | 1.53  | 1.37  | 1.24  | 3.21        | 2.05  | 1.55  | 1.54  | 1.25  |
|     | RF         | 11.12                   | 9.94  | 8.77  | 7.94  | 7.75  | 10.05       | 9.37  | 8.33  | 8.38  | 7.23  |
|     | robust GAM | 1.54                    |       |       |       |       | 2.54        |       |       |       |       |
|     | $n$        | 200                     | 400   | 600   | 800   | 1000  | 200         | 400   | 600   | 800   | 1000  |
| MAE | robust GBM | 1.44                    | 1.32  | 0.99  | 0.90  | 0.80  | 1.57        | 1.21  | 1.03  | 0.94  | 0.87  |
|     | GBM        | 3.40                    | 3.56  | 2.49  | 2.23  | 2.05  | 3.62        | 2.91  | 2.58  | 2.34  | 2.06  |
|     | robust NN  | 1.86                    | 1.14  | 0.93  | 0.80  | 0.75  | 1.89        | 1.19  | 0.98  | 0.83  | 0.79  |
|     | NN         | 1.99                    | 1.53  | 1.33  | 1.23  | 1.14  | 2.04        | 1.57  | 1.34  | 1.26  | 1.14  |
|     | robust RF  | 1.27                    | 0.99  | 0.90  | 0.84  | 0.79  | 1.32        | 1.03  | 0.89  | 0.89  | 0.80  |
|     | RF         | 2.02                    | 3.56  | 1.80  | 1.73  | 1.70  | 2.08        | 4.08  | 1.89  | 1.83  | 1.75  |
|     | robust GAM | 0.83                    |       |       |       |       | 1.13        |       |       |       |       |
|     |            | RL                      |       |       |       |       |             |       |       |       |       |
|     |            | $Laplace(0, \sqrt{50})$ |       |       |       |       | $N(0, 100)$ |       |       |       |       |
|     | $n$        | 200                     | 400   | 600   | 800   | 1000  | 200         | 400   | 600   | 800   | 1000  |
| MSE | robust GBM | 4.87                    | 2.88  | 2.19  | 1.77  | 1.52  | 6.46        | 3.19  | 2.36  | 2.05  | 1.77  |
|     | GBM        | 36.93                   | 22.98 | 17.28 | 14.28 | 11.88 | 38.67       | 24.42 | 17.34 | 16.77 | 11.55 |
|     | robust NN  | 6.19                    | 2.48  | 1.48  | 1.23  | 1.04  | 6.28        | 2.67  | 1.44  | 1.33  | 1.07  |
|     | NN         | 6.78                    | 4.28  | 3.45  | 2.87  | 2.60  | 7.30        | 4.39  | 3.51  | 3.10  | 2.62  |
|     | robust RF  | 3.32                    | 2.24  | 1.76  | 1.59  | 1.39  | 4.14        | 2.92  | 2.20  | 1.92  | 1.34  |
|     | RF         | 49.57                   | 49.48 | 9.36  | 43.16 | 47.60 | 133.48      | 92.12 | 40.54 | 68.37 | 50.74 |
|     | robust GAM | 1.87                    |       |       |       |       | 3.03        |       |       |       |       |
|     | $n$        | 200                     | 400   | 600   | 800   | 1000  | 200         | 400   | 600   | 800   | 1000  |
| MAE | robust GBM | 1.71                    | 1.32  | 1.07  | 1.01  | 0.93  | 1.95        | 1.38  | 1.18  | 1.08  | 1.00  |
|     | GBM        | 4.56                    | 3.56  | 2.50  | 2.73  | 2.48  | 4.78        | 3.71  | 3.16  | 2.97  | 2.53  |
|     | robust NN  | 1.94                    | 1.19  | 0.91  | 0.83  | 0.77  | 1.96        | 1.23  | 0.92  | 0.87  | 0.78  |
|     | NN         | 2.03                    | 1.60  | 1.43  | 1.31  | 1.24  | 2.12        | 1.63  | 1.44  | 1.36  | 1.26  |
|     | robust RF  | 1.27                    | 0.99  | 0.86  | 0.81  | 0.72  | 1.36        | 1.03  | 0.87  | 0.85  | 0.77  |
|     | RF         | 3.61                    | 3.56  | 1.81  | 3.57  | 3.67  | 4.61        | 4.08  | 3.64  | 4.35  | 3.89  |
|     | robust GAM | 0.79                    |       |       |       |       | 1.10        |       |       |       |       |
|     |            | AIPW                    |       |       |       |       |             |       |       |       |       |
|     |            | $Laplace(0, \sqrt{50})$ |       |       |       |       | $N(0, 100)$ |       |       |       |       |
|     | $n$        | 200                     | 400   | 600   | 800   | 1000  | 200         | 400   | 600   | 800   | 1000  |
| MSE | robust GBM | 4.55                    | 3.13  | 2.09  | 1.70  | 1.41  | 5.23        | 3.15  | 2.36  | 1.87  | 1.73  |
|     | GBM        | 19.10                   | 14.01 | 11.75 | 8.61  | 7.32  | 20.36       | 13.40 | 12.07 | 9.90  | 7.52  |
|     | robust NN  | 5.12                    | 2.17  | 1.57  | 1.18  | 0.94  | 5.88        | 2.48  | 1.58  | 1.24  | 0.99  |
|     | NN         | 1.97                    | 3.77  | 2.91  | 2.46  | 2.23  | 6.86        | 4.24  | 3.14  | 2.57  | 2.34  |
|     | robust RF  | 2.80                    | 1.98  | 1.36  | 1.29  | 1.18  | 3.25        | 1.98  | 1.56  | 1.37  | 1.18  |
|     | RF         | 10.57                   | 9.66  | 9.36  | 8.58  | 8.33  | 9.98        | 8.81  | 9.21  | 9.86  | 8.66  |
|     | robust GAM | 2.52                    |       |       |       |       | 3.04        |       |       |       |       |
|     | $n$        | 200                     | 400   | 600   | 800   | 1000  | 200         | 400   | 600   | 800   | 1000  |
| MAE | robust GBM | 1.65                    | 1.33  | 1.07  | 0.94  | 0.84  | 1.77        | 1.33  | 1.13  | 0.99  | 0.92  |
|     | GBM        | 3.35                    | 2.78  | 2.50  | 2.13  | 1.98  | 3.50        | 2.81  | 2.59  | 2.31  | 2.05  |
|     | robust NN  | 1.76                    | 1.11  | 0.93  | 0.81  | 0.73  | 1.89        | 1.19  | 0.96  | 0.84  | 0.76  |
|     | NN         | 1.97                    | 1.50  | 1.31  | 1.20  | 1.15  | 2.05        | 1.59  | 1.37  | 1.23  | 1.17  |
|     | robust RF  | 1.21                    | 0.99  | 0.86  | 0.82  | 0.78  | 1.32        | 1.01  | 0.89  | 0.84  | 0.77  |
|     | RF         | 1.98                    | 1.89  | 1.81  | 1.73  | 1.68  | 2.09        | 1.94  | 1.92  | 1.87  | 1.76  |
|     | robust GAM | 0.99                    |       |       |       |       | 1.11        |       |       |       |       |

Table B.2: Simulation Results of Simulation S ( $n_0 = 1000$ )

|     |            | MCM-EA                  |       |       |       |             |       |       |       |
|-----|------------|-------------------------|-------|-------|-------|-------------|-------|-------|-------|
|     |            | $Laplace(0, \sqrt{50})$ |       |       |       | $N(0, 100)$ |       |       |       |
| $n$ |            | 1000                    | 3000  | 5000  | 7000  | 1000        | 3000  | 5000  | 7000  |
| MSE | robust GBM | 1.85                    | 1.01  | 0.80  | 0.80  | 1.83        | 0.97  | 0.83  | 0.77  |
|     | GBM        | 11.22                   | 2.71  | 1.99  | 1.55  | 11.10       | 2.83  | 2.03  | 1.59  |
|     | robust NN  | 1.48                    | 1.04  | 0.84  | 0.78  | 1.46        | 1.03  | 0.86  | 0.84  |
|     | NN         | 2.76                    | 2.61  | 2.18  | 1.88  | 2.74        | 2.76  | 2.20  | 1.95  |
|     | robust RF  | 1.63                    | 1.31  | 1.01  | 0.84  | 1.62        | 1.17  | 0.96  | 0.88  |
|     | RF         | 5.12                    | 5.00  | 4.28  | 4.13  | 5.26        | 4.85  | 4.11  | 3.81  |
|     | robust GAM | 0.87                    |       |       |       | 0.88        |       |       |       |
| $n$ |            | 1000                    | 3000  | 5000  | 7000  | 1000        | 3000  | 5000  | 7000  |
| MAE | robust GBM | 1.06                    | 0.75  | 0.67  | 0.61  | 1.06        | 0.74  | 0.68  | 0.68  |
|     | GBM        | 2.56                    | 1.23  | 1.05  | 0.93  | 2.58        | 1.28  | 1.07  | 0.94  |
|     | robust NN  | 0.94                    | 0.77  | 0.69  | 0.62  | 0.93        | 0.77  | 0.70  | 0.72  |
|     | NN         | 1.28                    | 1.23  | 1.13  | 1.04  | 1.28        | 1.27  | 1.13  | 1.07  |
|     | robust RF  | 0.94                    | 0.84  | 0.72  | 0.67  | 0.92        | 0.79  | 0.71  | 0.68  |
|     | RF         | 1.51                    | 1.48  | 1.40  | 1.36  | 1.58        | 1.53  | 1.44  | 1.37  |
|     | robust GAM | 0.60                    |       |       |       | 0.63        |       |       |       |
|     |            | RL                      |       |       |       |             |       |       |       |
|     |            | $Laplace(0, \sqrt{50})$ |       |       |       | $N(0, 100)$ |       |       |       |
| $n$ |            | 1000                    | 3000  | 5000  | 7000  | 1000        | 3000  | 5000  | 7000  |
| MSE | robust GBM | 2.21                    | 0.72  | 0.45  | 0.30  | 2.27        | 0.72  | 0.45  | 0.30  |
|     | GBM        | 29.31                   | 4.55  | 3.01  | 2.14  | 27.49       | 5.02  | 3.04  | 1.80  |
|     | robust NN  | 1.29                    | 0.77  | 0.53  | 0.36  | 1.36        | 0.80  | 0.55  | 0.37  |
|     | NN         | 3.58                    | 3.26  | 2.58  | 1.90  | 3.66        | 3.51  | 2.55  | 1.93  |
|     | robust RF  | 0.98                    | 0.73  | 0.60  | 0.50  | 1.09        | 0.85  | 0.70  | 0.62  |
|     | RF         | 107.18                  | 91.18 | 91.12 | 72.19 | 127.63      | 91.68 | 81.65 | 70.37 |
|     | robust GAM | 0.64                    |       |       |       | 0.61        |       |       |       |
| $n$ |            | 1000                    | 3000  | 5000  | 7000  | 1000        | 3000  | 5000  | 7000  |
| MAE | robust GBM | 1.14                    | 0.64  | 0.50  | 0.40  | 1.15        | 0.63  | 0.49  | 0.40  |
|     | GBM        | 3.80                    | 1.51  | 1.20  | 0.97  | 3.75        | 1.59  | 1.25  | 0.96  |
|     | robust NN  | 0.88                    | 0.67  | 0.55  | 0.46  | 0.90        | 0.68  | 0.56  | 0.46  |
|     | NN         | 1.45                    | 1.37  | 1.22  | 1.04  | 1.47        | 1.42  | 1.22  | 1.06  |
|     | robust RF  | 0.71                    | 0.62  | 0.54  | 0.46  | 0.70        | 0.60  | 0.51  | 0.47  |
|     | RF         | 5.44                    | 4.89  | 4.61  | 4.04  | 5.73        | 4.96  | 4.65  | 4.19  |
|     | robust GAM | 0.56                    |       |       |       | 0.53        |       |       |       |
|     |            | AIPW                    |       |       |       |             |       |       |       |
|     |            | $Laplace(0, \sqrt{50})$ |       |       |       | $N(0, 100)$ |       |       |       |
| $n$ |            | 1000                    | 3000  | 5000  | 7000  | 1000        | 3000  | 5000  | 7000  |
| MSE | robust GBM | 2.46                    | 1.55  | 0.82  | 0.60  | 2.99        | 1.29  | 1.07  | 0.98  |
|     | GBM        | 14.43                   | 3.98  | 2.47  | 1.54  | 15.25       | 3.51  | 4.17  | 1.88  |
|     | robust NN  | 1.43                    | 0.94  | 0.66  | 0.43  | 1.46        | 0.89  | 0.63  | 0.43  |
|     | NN         | 3.83                    | 3.27  | 2.54  | 2.04  | 3.61        | 3.15  | 2.67  | 2.06  |
|     | robust RF  | 1.28                    | 1.00  | 0.73  | 0.57  | 1.35        | 0.93  | 0.75  | 0.63  |
|     | RF         | 7.80                    | 7.76  | 7.51  | 6.20  | 7.97        | 7.39  | 7.09  | 6.72  |
|     | robust GAM | 0.63                    |       |       |       | 0.75        |       |       |       |
| $n$ |            | 1000                    | 3000  | 5000  | 7000  | 1000        | 3000  | 5000  | 7000  |
| MAE | robust GBM | 1.48                    | 0.77  | 0.59  | 0.48  | 1.15        | 0.76  | 0.61  | 0.48  |
|     | GBM        | 2.82                    | 1.37  | 1.10  | 0.85  | 2.87        | 1.37  | 1.11  | 0.85  |
|     | robust NN  | 0.92                    | 0.73  | 0.61  | 0.49  | 0.93        | 0.72  | 0.60  | 0.49  |
|     | NN         | 1.46                    | 1.35  | 1.20  | 1.07  | 1.46        | 1.34  | 1.23  | 1.07  |
|     | robust RF  | 0.81                    | 0.71  | 0.59  | 0.47  | 0.83        | 0.69  | 0.60  | 0.53  |
|     | RF         | 1.65                    | 1.64  | 1.56  | 1.45  | 1.69        | 1.69  | 1.59  | 1.55  |
|     | robust GAM | 0.52                    |       |       |       | 0.53        |       |       |       |

Table B.3: Simulation Results (Coverage Probabilities) of Simulation 1

|            | MCM-EA                  |      |      |      |      |      |      |             |      |      |      |      |      |      |
|------------|-------------------------|------|------|------|------|------|------|-------------|------|------|------|------|------|------|
|            | $Laplace(0, \sqrt{50})$ |      |      |      |      |      |      | $N(0, 100)$ |      |      |      |      |      |      |
| $p_o$      | 0.00                    | 0.05 | 0.10 | 0.15 | 0.20 | 0.30 | 0.50 | 0.00        | 0.05 | 0.10 | 0.15 | 0.20 | 0.30 | 0.50 |
| Robust GBM | 0.95                    | 0.94 | 0.91 | 0.93 | 0.93 | 0.95 | 0.97 | 0.95        | 0.94 | 0.95 | 0.94 | 0.94 | 0.98 | 0.97 |
| GBM        | 0.95                    | 0.93 | 0.96 | 0.96 | 0.94 | 0.97 | 0.96 | 0.95        | 0.96 | 0.97 | 0.99 | 0.99 | 0.91 | 0.95 |
| Robust NN  | 0.95                    | 0.94 | 0.96 | 0.92 | 0.94 | 0.99 | 0.98 | 0.95        | 0.92 | 0.98 | 0.92 | 0.95 | 0.98 | 0.93 |
| NN         | 0.96                    | 0.76 | 0.87 | 0.47 | 0.83 | 0.79 | 0.89 | 0.96        | 0.39 | 0.43 | 0.27 | 0.32 | 0.35 | 0.29 |
| Robust RF  | 0.94                    | 0.96 | 0.97 | 0.94 | 0.92 | 0.93 | 0.98 | 0.94        | 0.95 | 0.94 | 0.93 | 0.92 | 0.96 | 0.98 |
| RF         | 0.96                    | 0.96 | 0.98 | 0.97 | 0.97 | 0.89 | 0.96 | 0.96        | 0.90 | 0.92 | 0.92 | 0.93 | 0.89 | 0.87 |
| Robust GAM | 0.23                    | 0.38 | 0.49 | 0.54 | 0.57 | 0.66 | 0.74 | 0.23        | 0.39 | 0.48 | 0.54 | 0.59 | 0.66 | 0.76 |
| Robust QL  | 0.47                    | 0.49 | 0.49 | 0.52 | 0.53 | 0.53 | 0.00 | 0.47        | 0.49 | 0.50 | 0.51 | 0.53 | 0.33 | 0.00 |
|            | RL                      |      |      |      |      |      |      |             |      |      |      |      |      |      |
|            | $Laplace(0, \sqrt{50})$ |      |      |      |      |      |      | $N(0, 100)$ |      |      |      |      |      |      |
| $p_o$      | 0.00                    | 0.05 | 0.10 | 0.15 | 0.20 | 0.30 | 0.50 | 0.00        | 0.05 | 0.10 | 0.15 | 0.20 | 0.30 | 0.50 |
| Robust GBM | 0.95                    | 0.94 | 0.95 | 0.96 | 0.95 | 0.97 | 0.97 | 0.95        | 0.95 | 0.96 | 0.94 | 0.96 | 0.91 | 0.98 |
| GBM        | 0.93                    | 0.97 | 0.98 | 0.98 | 0.97 | 0.96 | 0.95 | 0.93        | 0.99 | 0.98 | 0.99 | 1.00 | 1.00 | 0.99 |
| Robust NN  | 0.94                    | 0.95 | 0.93 | 0.96 | 0.92 | 0.93 | 0.96 | 0.94        | 0.95 | 0.96 | 0.93 | 0.97 | 0.91 | 0.98 |
| NN         | 0.96                    | 0.82 | 0.94 | 0.95 | 0.88 | 0.85 | 0.91 | 0.96        | 0.94 | 0.93 | 0.94 | 0.85 | 0.82 | 0.36 |
| Robust RF  | 0.95                    | 0.96 | 0.97 | 0.94 | 0.98 | 0.95 | 0.94 | 0.95        | 0.92 | 0.91 | 0.90 | 0.87 | 0.82 | 0.72 |
| RF         | 0.94                    | 0.89 | 0.98 | 0.97 | 0.87 | 0.93 | 0.94 | 0.94        | 0.82 | 0.93 | 0.89 | 0.95 | 0.89 | 0.86 |
| Robust GAM | 0.27                    | 0.48 | 0.57 | 0.61 | 0.65 | 0.71 | 0.80 | 0.27        | 0.49 | 0.58 | 0.64 | 0.65 | 0.72 | 0.81 |
| Robust QL  | 0.47                    | 0.49 | 0.49 | 0.52 | 0.53 | 0.53 | 0.00 | 0.47        | 0.49 | 0.50 | 0.51 | 0.53 | 0.33 | 0.00 |
|            | AIPW                    |      |      |      |      |      |      |             |      |      |      |      |      |      |
|            | $Laplace(0, \sqrt{50})$ |      |      |      |      |      |      | $N(0, 100)$ |      |      |      |      |      |      |
| $p_o$      | 0.00                    | 0.05 | 0.10 | 0.15 | 0.20 | 0.30 | 0.50 | 0.00        | 0.05 | 0.10 | 0.15 | 0.20 | 0.30 | 0.50 |
| Robust GBM | 0.96                    | 0.93 | 0.92 | 0.91 | 0.90 | 0.89 | 0.90 | 0.96        | 0.94 | 0.93 | 0.92 | 0.90 | 0.98 | 0.93 |
| GBM        | 0.96                    | 0.92 | 0.98 | 0.97 | 0.95 | 0.95 | 0.98 | 0.96        | 0.97 | 0.96 | 0.99 | 0.97 | 0.90 | 0.91 |
| Robust NN  | 0.94                    | 0.92 | 0.95 | 0.93 | 0.92 | 0.96 | 0.98 | 0.94        | 0.98 | 0.96 | 0.93 | 0.95 | 0.93 | 0.98 |
| NN         | 0.95                    | 0.74 | 0.89 | 0.96 | 0.80 | 0.73 | 0.88 | 0.95        | 0.44 | 0.88 | 0.84 | 0.87 | 0.83 | 0.78 |
| Robust RF  | 0.93                    | 0.94 | 0.98 | 0.91 | 0.97 | 0.96 | 0.98 | 0.93        | 0.96 | 0.97 | 0.94 | 0.95 | 0.96 | 0.95 |
| RF         | 0.94                    | 0.98 | 0.97 | 0.93 | 0.93 | 0.82 | 0.96 | 0.94        | 0.94 | 0.91 | 0.87 | 0.95 | 0.86 | 0.82 |
| Robust GAM | 0.54                    | 0.57 | 0.59 | 0.61 | 0.62 | 0.64 | 0.70 | 0.54        | 0.58 | 0.59 | 0.61 | 0.64 | 0.66 | 0.73 |
| Robust QL  | 0.47                    | 0.49 | 0.49 | 0.52 | 0.53 | 0.53 | 0.00 | 0.47        | 0.49 | 0.50 | 0.51 | 0.53 | 0.33 | 0.00 |

Table B.4: Tuning parameters of considered methods in simulation

| Method                    | Parameter                                         | Value                                            |
|---------------------------|---------------------------------------------------|--------------------------------------------------|
| RF-based algorithms       | Number of trees                                   | 50                                               |
|                           | Fraction of features used in splitting            | 0.8                                              |
|                           | Minimum node size                                 | 3                                                |
| Boosting-based algorithms | Number of trees                                   | 1000                                             |
|                           | Depth of trees                                    | 2                                                |
|                           | Learning rate                                     | 0.1                                              |
| Robust ANN                | Number of hidden layers                           | 2                                                |
|                           | Number of neurons in hidden layers                | $p$ and $p/2$                                    |
|                           | Adam optimization                                 | $\alpha = 0.001, \beta_1 = 0.9, \beta_2 = 0.999$ |
|                           | $L_1$ regularization ( $p = 100, 2000$ )          | 0.1, if $p = 100$ ; 0.02, if $p = 2000$ .        |
| Robust GAM and QL         | Number of neurons in hidden layers ( $p = 2000$ ) | $p/10$ and $p/40$                                |
|                           | Number of knots                                   | $\sqrt{n}/2$                                     |
|                           | Number of degree                                  | 3                                                |
|                           | $\gamma$ in SCAD                                  | 3.7                                              |
